# Supplementary material
Source: PubMed Central journal article supplement (PMC3058611)

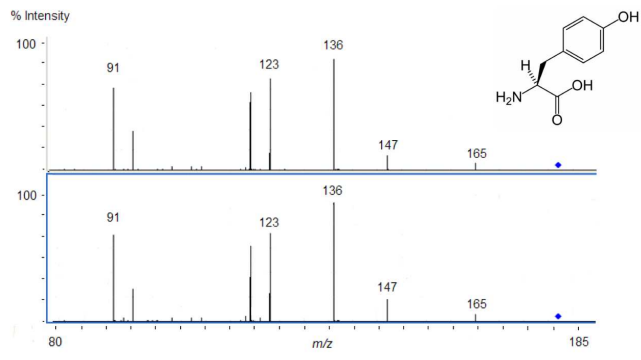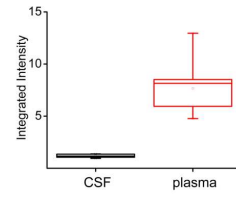

82x33mm (600 x 600 DPI)

Supplement: NIHMS272061-supplement-3_si_003.pdf [file NIHMS272061-supplement-3_si_003.pdf]
